# **Rapid Detection of Norovirus Using Paper-based Microfluidic Device**

**Xuan Weng<sup>1</sup>, Suresh Neethirajan<sup>1\*</sup>**

1  
2  
3  
4  
5  
6  
7  
8  
9  
10  
11  
12  
13  
14  
15  
16  
17  
18  
19  
20

21 \*Correspondence: [sneethir@uoguelph.ca](mailto:sneethir@uoguelph.ca) (S. Neethirajan)

22 BioNano Laboratory, School of Engineering, University of Guelph, Guelph, Canada

23 **Abstract**

24 Noroviruses (NoV) are the leading cause of outbreak of acute gastroenteritis worldwide. A  
25 substantial effort has been made in the development of analytical devices for rapid and sensitive  
26 food safety monitoring via the detection of foodborne bacteria, viruses and parasites.  
27 Conventional analytical approaches for noroviruses suffer from some critical weaknesses: labor-  
28 intensive, time-consuming, and relatively low sensitivity. In this study, we developed a rapid  
29 and highly sensitive biosensor towards point-of-care device for noroviruses based on 6-  
30 carboxyfluorescein (6-FAM) labeled aptamer and nanomaterials, multi-walled carbon nanotubes  
31 (MWCNTs) and graphene oxide (GO). In an assay, the fluorescence of 6-FAM labeled aptamer  
32 was quenched by MWCNTs or GO via fluorescence resonance energy transfer (FRET). In the  
33 presence of norovirus, the fluorescence would be recovered due to the release of the 6-FAM  
34 labeled aptamer from MWCNTs or GO. An easy-to-make paper-based microfluidic platform  
35 made by nitrocellulose membrane was used to conduct the assay. The quantitative detection  
36 of norovirus virus-like particles (NoV VLPs) was successfully performed. A linear range of 0-  
37 12.9  $\mu\text{g/mL}$  with a detection limit of 40 pM and 30 pM was achieved for the MWCNTs and GO  
38 based paper sensors, respectively. The results suggested the developed paper-based microfluidic  
39 device is simple, cost-effective and holds the potential of rapid in situ visual determination for  
40 noroviruses with remarkable sensitivity and specificity, which provides a new way for early  
41 identification of NoV and thereby an early intervention for preventing the spread of an outbreak.

42 **Keywords:** Norovirus; Paper-based microfluidics; Nitrocellulose membrane; Multi-walled  
43 carbon nanotubes; Biosensor

44

45

## 46 **Introduction**

47 Noroviruses (NoV) are the leading causes of acute viral gastroenteritis [1], as well as one of the  
48 leading causes of foodborne disease outbreaks and the most common cause of infectious  
49 gastroenteritis worldwide [2], clinical symptoms including abdominal pain, diarrhea, muscle  
50 ache, and mild fever [3]. NoV infection may be direct from person to person or transmitted  
51 through food and drinks (ready-to-eat foods, table water) and the outbreak of which is frequently  
52 occurred in community facilities such as hospitals and school cafeterias. Currently, NoV are  
53 usually detected after an outbreak on the suspected food with a range of methods, including  
54 enzyme-linked immuno-sorbent assay (ELISA) [4], western blot [5], and nucleic acid-based  
55 methods, such as reverse transcription polymerase chain reaction (RT-PCR) [6] etc. These  
56 methods usually require expensive reagents, specialized equipment, and skillful researchers to  
57 perform the analyses and long waiting time for the results. In addition, antibodies are usually  
58 used in the biomolecular recognition, however, antibodies are usually expensive, have limited  
59 shelf-life and false-positive issues may occur due to the cross-reactivity between the antibodies  
60 and non-target molecules. Since the NoV have high resistance to routine disinfection and low  
61 infection dose, early on-site detection is extremely important for the prevention of the  
62 transmission and effective controlling of the infection as well as the spread of an outbreak. In  
63 addition, NoV, in cases, can be pre-emptively identified to efficiently block and reduce the  
64 infection [7]. FDA of United States approved the first early detection NoV test in 2011. All of  
65 the aforementioned reasons urge the need for more rapid, accurate, and ultra-sensitive assays to  
66 detect potential NoV contamination in complex food matrices. Development of such a method  
67 for NoV associated with foodborne illness can be a powerful tool for the application in response  
68 to outbreak management.

69 To date, researchers have put numerous efforts in the development of rapid and efficient  
70 methods, and biosensor is one of the promising ways to provide alternative to conventional  
71 assays due to its features of rapid, simple, reproducible, and cost-effective. Hong et al. [8]  
72 reported an electrochemical biosensor for pre-emptive on-site NoV detection by using  
73 nanostructured gold electrode conjugated with a NoV capturing agent concanavalin A. The  
74 biosensor was able to detect NoV in a concentration range of  $10^2$  and  $10^6$  copies/mL within 1  
75 hour. Hwang et al. [9] reported a label-free electrochemical biosensor for human NoV detection  
76 using affinity peptide and a limit of detection (LoD) of 7.8 copies/mL was achieved. Although  
77 electrochemical biosensors are able to provide high sensitivity detection, the relative high price  
78 make them not suitable to be used in disposable chips for on-site detection [10]. Lateral-flow  
79 assays (LFAs) have been well developed and widely used in point-of-care testing (POCT), which  
80 have also been applied for virus detection [11, 12]. The main drawbacks of most of LFAs are  
81 the low sensitivity and the yes/no results. The introduction of nanomaterial contributes to the  
82 enhancement of sensitivity. Hagström et al. [13] developed a LFA for the detection of NoV by  
83 using nanoparticle reporters and a LoD of  $10^7$  virus-like particles per microliter was obtained.

84 Paper-based microfluidic devices, as alternative to the traditional microfluidic devices made  
85 by PDMS, glass, silicon or other polymers, find their applications in biochemical, health  
86 diagnosis and food safety fields due to its unique advantages, including the low cost, easy-to-  
87 fabricate process and the simplicity [14, 15]. In addition, paper-based microfluidic devices are  
88 powerless due to the capillary action of the hydrophobic channel. Currently, wax printing  
89 technique is being used to fabricate the paper-based microfluidic devices.

90 Therefore, we developed a simple, low-cost and easy-to-make paper-based microfluidic  
91 device with multi-detection capability for determination of virus contaminants in food. NoV was

92 used as the testing model. Carbon nanostructures usually have a wide range of absorption  
93 spectrum overlapping with the fluorescence spectra of various fluorophores [16], which allows  
94 FRET between them. The paper-based microfluidic device utilized FRET between nanomaterials  
95 and the virus probe functionalized fluorophore to quantitatively determine the concentration of  
96 the sample. In the present work, 6-carboxyfluorescein (6-FAM) labeled norovirus aptamer  
97 associated with MWCNTs or GO was employed as the “probe” to sensitively sense the presence  
98 of NoV with high specificity. MWCNTs consist of multiple rolled layers (concentric tubes) of  
99 graphitic sheets [17] while GO is a single-atom-thick two-dimensional carbon nanomaterial and  
100 both of them are efficient quenchers to various fluorophores [18, 19]. In our study, the efficiency  
101 of two kinds of nanomaterials namely, MWCNTs and GO, as the fluorescence quencher were  
102 investigated. In addition, the sensing probe was operated on an easy-to-make paper-based  
103 microfluidic device which is inexpensive and can be easily fabricated by a paper puncher within  
104 a minute. Such paper-based microfluidic device is power free because sample can be driven by  
105 the capillary force, and can be easily made within 1 min. The design of the paper-based  
106 microfluidic device allows for multiplex detection (up to 6). Another advantage of using paper  
107 substrate is the avoidance of complicated processes of probe immobilization and surface  
108 modification which can be achieved through the physical absorption. Schematic illustration in  
109 the Fig. 1a and 1b shows the main principle of this sensor, as an example, only the MWCNTs is  
110 illustrated. The principle of the sensing is based on the FRET between the fluorophores and  
111 nanostructure quenchers. The conformational change of the aptamer associated with the distance  
112 changes between the fluorophores and quenchers leads to a measurable fluorescence intensity. A  
113 ready-to-use device was made by loading the complex “probe” consisting of nanomaterial and  
114 target specific aptamer with fluorescence labelling onto the reaction wells and dries out. In an

115 assay, sample was loaded onto the sample well followed by diffusion to the reaction wells  
116 immediately and bind with the aptamers, leading to the recovery of the fluorescence. The  
117 recovered fluorescence intensity was then used to quantitatively determine the target  
118 concentration in the sample.

119

## 120 **Experimental**

### 121 **Materials and chemicals**

122 Carboxylic acid functionalized MWCNTs, graphene oxide, nitrocellulose membranes  
123 (Whatman® Protran®) and all other mentioned chemicals and solvents were purchased from  
124 Sigma-Aldrich (Oakville, ON, Canada). The 6-carboxyfluorescein (6-FAM) binding norovirus  
125 aptamer was synthesized by Integrated DNA Technologies, Inc. (Coralville, IA, USA) with the  
126 sequence of 5'-AGT ATA CGT ATT ACC TGC AGC CCA TGT TTT GTA GGT GTA ATA  
127 GGT CAT GTT AGG GTT TCT GCG ATA TCT CGG AGA TCT TGC-3' [20]. The virus like  
128 particles (VLPs) formed by group 2 Norovirus capsid antigen were purchased from  
129 MyBioSource, Inc. (San Diego, CA, USA). The craft paper punch was purchased from  
130 Amazon.ca (McGill®, Paper Blossoms Lever Punch-Multi Daisy, .625" To 1"). Unless  
131 otherwise noted, all reagents were of analytical grade unless otherwise stated, all solutions were  
132 prepared with double-distilled water.

133

### 134 **Preparation of 6-FAM Aptamer Functionalized and MWCNTs /GO**

135

136 The probe of 6-FAM aptamer was prepared by firstly resuspending the dried aptamer pellet in  
137 the TE buffer (10 mM Tris HCl, 0.1 mM EDTA, pH 8.0) and followed by incubation for 30 min

138 at room temperature. Then a series of aptamer solution was made with folding buffer (1 mM  
139 MgCl<sub>2</sub>, 1×PBS, pH 7.4) and heated at 85°C for 5 min. This was then followed by cooling down  
140 the dilutions before use.

141 MWCNTs and GO were diluted with DI water to a series of concentrations ranging from  
142 0.005 to 0.1 mg/mL. Then we mixed the MWCNTs or GO dilutions with 6-FAM aptamer  
143 working solutions of specific concentrations and incubated for a period of time to quench the  
144 fluorescence of the aptamer. The mixture was then pipetted onto the detection area of the paper-  
145 based microfluidic device. The incubation time was optimized by investigating the fluorescence  
146 signal at time points of 1 min, 5 min, 10 min and 20 min. Serial dilutions of NoV VLPs stocks  
147 (10-fold) were prepared on a range of 0~12.9 µg/mL using 1X phosphate buffered saline (PBS  
148 Buffer) solution.

149

#### 150 **Paper-based microfluidic device fabrication and assay procedure**

151 The schematic of the paper-based microfluidic device design illustrating the sensing mechanism  
152 as well as the picture of the device is shown in Fig. 1c and 1d. A blossoms lever-shaped paper  
153 device was patterned manually as the paper-based microfluidic device on the nitrocellulose  
154 membranes by a craft punch under room temperature. The width of the “arm” channels was 500  
155 µm, the diameters of the center area (sample loading point) and the detection area were 3 mm  
156 and 1 mm, respectively.

157 Nitrocellulose membranes were used to make the paper-based microfluidic device.  
158 Nitrocellulose membranes are a popular matrix that can be used for simple and rapid protein  
159 immobilization because of its non-specific affinity for amino acids [21]. The mixture of 6-FAM  
160 aptamer solution and MWCNTs or GO was pipetted onto the detection area of the paper-based

161 microfluidic device and allowed to dry in the air for 20 min. The dried paper was then undergone  
162 the blocking treatment by using PBS with 5% BSA and 0.05% Tween-20 for 30 min. The  
163 blocked paper device was then ready to use and could be stored at 4 °C for short term storage. It  
164 is noted that the nitrocellulose membrane based paper device should be kept in a dry atmosphere  
165 and away from noxious fumes, avoiding exposure to sunlight, which is conducive to extending  
166 the shelf life of nitrocellulose membranes-based diagnostic device and maintaining the molecular  
167 recognition capability of immobilized proteins for a long time, even a few years.

168

169 During an assay, the fluorescence intensities of the reaction (sensing) zone were recorded as  
170 reference. Then aliquots of varying concentrations of NoV VLPs in PBS buffer (10 $\mu$ L) and  
171 controls were loaded onto the central, the liquid would diffuse into the detection area  
172 spontaneously due to the capillary force. After incubation, the fluorescence intensities of the  
173 reaction (sensing) zone were measured again to quantitatively analyse the sample concentration.  
174 Each sample was tested 3 times. Three independent experiments were carried out for each  
175 conditions.

## 176 **Characterization and optimization**

177 Transmission electron micrographs were obtained using the FEI-Tecani G2, operating at 200kV.  
178 The fluorescent imaging (Ex/ Em=490nm/520 nm) of the detection area was taken on a  
179 fluorescent microscopy (Nikon Eclipse Ti, Nikon Canada Inc., Mississauga, ON, Canada). All  
180 images were taken under the same settings, namely exposure time, magnification, etc. The  
181 fluorescence intensity was then analyzed by Nikon NIS Elements BR version 4.13 software to



182 investigate the concentration of the sample. For the validation tests, the fluorescence spectra  
183 were recorded by the Cytation 5 Multi-mode Reader (BioTek, Winooski, VT, USA).

184 The ratio of the 6-FAM aptamer solution and MWCNTs/ GO, quenching and recovery time  
185 were optimized. In a typical optimization test, 20  $\mu$ L of 6-FAM aptamer, 20  $\mu$ L of MWCNTs/  
186 GO solution were well mixed. Fluorescence intensity was measured at the time points of 0, 5 min,  
187 10 min, 15 min and 20 min. Afterwards, 20  $\mu$ L of NoV VLPs standard solution was added and  
188 mixed well. After incubation for a period time, the recovered fluorescence intensity of the  
189 resulting solutions was analyzed. The relationship between the fluorescence intensity change and  
190 the corresponding concentration was plotted. The fluorescence spectra were measured at Ex/  
191 Em= 490 nm/ 520 nm by the Multi-mode Reader. All samples were prepared in triplicates.

192

## 193 **Results and discussion**

### 194 **Characterization, validation and optimization of the biosensor**

195 The TEM images of the carboxylic acid functionalized MWCNTs and GO clearly showed the  
196 tubular and sheet nanostructures (Fig. 2a and 2b). The UV-Vis absorption spectra of the  
197 carboxylic acid functionalized MWCNTs and bare GO are shown in Fig. 2c and as shown the  
198 maximum absorption peaks appear at 253 nm and 258 nm, respectively. Fig. 2d shows the  
199 fluorescence spectra of the 6-FAM NoV aptamer. The fluorescence intensity peak is located at a  
200 wavelength of 520 nm.

201 The quenching effect of two nanomaterials, MWCNTs and GO, were investigated and  
202 compared. In order to obtain optimum performance, the concentrations of the MWCNTs, GO,  
203 NoV aptamer as well as the reaction (incubation) time were studied, respectively. For the  
204 nanomaterials MWCNTs and GO, a series concentrations, 0.05, 0.1, 0.5 and 1.0 mg/mL, were

205 investigated, respectively. And for the NoV aptamer, 1  $\mu\text{M}$  and 5  $\mu\text{M}$  were chosen for further  
206 experiments. The influence of reaction time on the fluorescence intensities of before and after  
207 quenching were also studied. Fig. 3 and Fig. 4 show the fluorescence quenching and recovery of  
208 the NoV aptamer of 1  $\mu\text{M}$  and 5  $\mu\text{M}$  by various of concentrations of MWCNTs and GO when  
209 detecting the NoV sample of 129 ng/mL. The validation of these optimization testing was  
210 conducted by a microplate reader. All assays were performed at room temperature. As shown in  
211 Fig. 3a and 3b, higher quenching effect was found at the 0.1 mg/mL of MWCNTs when NoV  
212 aptamer was at 1  $\mu\text{M}$  while 0.05 mg/mL of MWCNTs had higher one when the concentration of  
213 NoV aptamer increased to 5  $\mu\text{M}$ . For the nanostructure GO, there is no notable difference  
214 between 0.05 mg/mL and 0.1 mg/mL was observed when NoV aptamer was at 1  $\mu\text{M}$  and 5  $\mu\text{M}$ ,  
215 as shown in Fig. 4a and 4b. A slightly strong quenching effect was found by GO compared to  
216 that of MWCNTs, which can be attributed to the more interaction area of the sheet structure of  
217 GO than the tube structure of MWCNTs. Fig. 3c, 3d and Fig. 4c, 4d shows the recovering of the  
218 fluorescence quenched by MWCNTs and GO, respectively. Remarkable recovery of the  
219 fluorescence quenched appeared for both of them, which was attributed to FRET generated by  
220 the synergy of particles collision and  $\pi$ - $\pi$  stacking interaction between them and aptamer [22].  
221 However, the recovery level varies. For the MWCNTs, the optimum recovery appeared at the  
222 setting of NoV aptamer of 5  $\mu\text{M}$  and MWCNTs of 0.1 mg/mL, as shown in Fig.3d. While for the  
223 GO, the optimum recovery appeared at the setting of NoV aptamer of 5  $\mu\text{M}$  and GO of 0.05  
224 mg/mL. A slightly strong quenching effect was found by GO compared to that of MWCNTs,  
225 which can be attributed to the more interaction area of the sheet structure of GO than the tube  
226 structure of MWCNTs. Thus a relative recovery rate can be achieved by GO.

227 Fig. 3 and Fig. 4 also show the time-dependent fluorescence intensity changes. The time-  
228 dependent response was studied to obtain a suitable incubation and reaction time for quenching  
229 and recovery. As shown in the figures, the quenching of the 6-FAM NoV aptamer occurred  
230 immediately after adding MWCNTs or GO, and a dramatic decline was observed within 5 min,  
231 and then became a plateau after prolonging time. As indicated in the Fig. 3 and Fig. 4, the  
232 recovery of the fluorescence could be completed within 5 min, because no notable intensity  
233 changes appeared afterwards. Thus 5 min was considered as the optimal incubation time for  
234 quenching as well as the optimal recovery time.

235

### 236 **Specificity of the biosensor**

237 We evaluated the selectivity of our biosensor by detected the NoV VLPs solution mixed with  
238 bovine serum albumin (BSA) and peptidoglycan, respectively. BSA was used as a blocking  
239 buffer for the paper based device, while peptidoglycan is the major cell wall component of both  
240 the gram positive and gram negative bacteria and may present in complex food matrices. The  
241 mixture of BSA and NoV VLPs (3.3 mg/mL and 129 ng/mL in final concentration), and the  
242 mixture of peptidoglycan and NoV VLPs (1.2 mg/mL and 129 ng/mL in final concentration)  
243 were detected. The results as shown in Fig. 5 confirms the excellent specificity of the developed  
244 biosensor. Notable changes in recovered fluorescence intensity were observed in all solutions  
245 due to the presence of NoV VLPs. However, no distinguishable changes in recovered  
246 fluorescence intensity were observed among the BSA or the peptidoglycan mixture with the NoV  
247 VLPs solution indicating the absence of any cross-reactivity. The results also demonstrate that  
248 the selected NoV aptamer can only specifically bind to the NoV VLPs.

249

## 250 **Detection of NoV VLPs**

251 As a validation, a series of NoV VLPs dilution were detected by a microplate reader under the  
252 optimized parameters. Fig. 6 shows the recovered fluorescence spectra versus various  
253 concentration of NoV VLPs ranging from 0 to 12.9  $\mu\text{g/mL}$ . The recovered fluorescence intensity  
254 increase with respect to the elevated protein concentration. No significant difference was  
255 observed between the spectra of 1.29  $\text{ng/mL}$  and that of after quenching. However,  
256 distinguishable fluorescence intensity changes appear when the concentration increased to 12.9  
257  $\text{ng/mL}$  for both the nanomaterials.

258 Under the optimized conditions, a series of NoV VLPs dilutions were assayed on the paper-  
259 based microfluidic device. For multiplex detection, up to 5 sample dilutions and a negative  
260 control could be assayed on a ready-to-use paper-based microfluidic device at one time. All tests  
261 were performed at room temperature. To reduce the errors, the difference between the recovered  
262 fluorescence intensity ( $I_R$ ) and after quenching ( $I_0$ ) was used to determine the NoV VLPs  
263 concentration in the sample. Fig. 7 shows the calibration curve of NoV VLPs assay by plotting  
264 the changes in fluorescence intensity versus the different concentration, with the linear range of  
265 0~12.9  $\mu\text{g/mL}$  and  $R^2$  being 0.9696 for MWCNTs and 0.9818 for GO. The LoD is calculated by  
266  $kS_bS$  [23], where  $S_b$  is the standard deviation of the blank measure,  $S$  is the sensitivity  
267 ( $\Delta\text{concentration}/\Delta\text{intensity}$ ) and  $k = 3$  is numerical factor. The LoDs of the paper-based  
268 microfluidic biosensor are 40 pM for MWCNTs and 30 pM for GO with 3% -7% in relative  
269 standard deviation (RSD).

270

## 271 **Conclusions**

272 A paper-based microfluidic biosensor is developed for the detection of norovirus. The biosensor  
273 utilized the FRET between the 6-carboxyfluorescein labelled norovirus aptamer and MWCNTs  
274 and GO. The MWCNTs would quench the fluorescence of aptamer when they were mixed  
275 together. In the presence of NoV, the fluorescence would be turned on (recovered) due to the  
276 specific binding with the aptamer. The quantitative results showed a limit of detection of 40 pM  
277 for MWCNTs and 30 pM for GO, respectively. The easy-to-make paper-based microfluidic  
278 biosensor could be easily applied for multi-virus diagnosis hence finds numerous applications in  
279 food sector and clinical diagnosis.

280

## 281 **Abbreviations**

282 NoV: noroviruses; 6-FAM: 6-carboxyfluorescein; MWCNTs: multi-walled carbon nanotubes;  
283 GO: graphene oxide; FRET: fluorescence resonance energy transfer; NoV VLPs: norovirus  
284 virus-like particles; ELISA: enzyme-linked immunosorbent assay; RT-PCR: reverse transcription  
285 polymerase chain reaction; LoD: limit of detection; LFAs: lateral-flow assays; POCT: point-of-  
286 care testing.

## 287 **Authors' contributions**

288 XW and SN designed the study; XW performed experiments, acquired and analyzed data, XW  
289 and SN drafted and edited the manuscript. All authors read and approved the final manuscript.

## 290 **Acknowledgements**

291 The authors sincerely thank the Natural Sciences and Engineering Research Council of Canada  
292 (400705) for funding this study.

## 293 **Competing interests**

294 The authors declare that they have no competing interests.

295 **Author details**

296 <sup>1</sup>BioNano Laboratory, School of Engineering, University of Guelph, Guelph, N1G 2W1

297 Canada. Email: [xuanw@uoguelph.ca](mailto:xuanw@uoguelph.ca)

298 \*BioNano Laboratory, School of Engineering, University of Guelph, Guelph, N1G 2W1

299 Canada. Email: [sneethir@uoguelph.ca](mailto:sneethir@uoguelph.ca)

300

301 **References**

- 302 1. Ahmed SM, Hall AJ, Robinson AE, Verhoef L, Premkumar P, Parashar UD, Koopmans  
303 M, Lopman BA. Global prevalence of norovirus in cases of gastroenteritis: a systematic  
304 review and meta-analysis. *The Lancet infectious diseases*. 2014; 14(8):725-30.
- 305 2. Koo HL, Ajami N, Atmar RL, DuPont HL. Noroviruses: the principal cause of foodborne  
306 disease worldwide. *Discovery medicine*. 2010; 10 (50):61.
- 307 3. Glass RI, Parashar UD, Estes MK. Norovirus gastroenteritis. *New England Journal of*  
308 *Medicine*. 2009; 361(18):1776-85.
- 309 4. Jiang XI, Wang MI, Graham DY, Estes MK. Expression, self-assembly, and antigenicity  
310 of the Norwalk virus capsid protein. *Journal of virology*. 1992; 66(11):6527-32.
- 311 5. Hayashi YU, Ando TA, Utagawa ET, Sekine SE, Okada SH, Yabuuchi K, Miki T,  
312 Ohashi M. Western blot (immunoblot) assay of small, round-structured virus associated  
313 with an acute gastroenteritis outbreak in Tokyo. *Journal of clinical microbiology*. 1989;  
314 27(8):1728-33.
- 315 6. Vinjé J, Vennema H, Maunula L, von Bonsdorff CH, Hoehne M, Schreier E, Richards A,  
316 Green J, Brown D, Beard SS, Monroe SS. International collaborative study to compare

- 317 reverse transcriptase PCR assays for detection and genotyping of noroviruses. *Journal of*  
318 *clinical microbiology*. 2003; 41(4):1423-33.
- 319 7. Sharma H, Mutharasan R. Review of biosensors for foodborne pathogens and toxins.  
320 *Sensors and actuators B: Chemical*. 2013; 183:535-49.
- 321 8. Hong SA, Kwon J, Kim D, Yang S. A rapid, sensitive and selective electrochemical  
322 biosensor with concanavalin A for the preemptive detection of norovirus. *Biosensors and*  
323 *Bioelectronics*. 2015; 64:338-44.
- 324 9. Hwang HJ, Ryu MY, Park CY, Ahn J, Park HG, Choi C, Ha SD, Park TJ, Park JP. High  
325 sensitive and selective electrochemical biosensor: Label-free detection of human  
326 norovirus using affinity peptide as molecular binder. *Biosensors and Bioelectronics*. 2017;  
327 87:164-70.
- 328 10. Ko SM, Kwon J, Vaidya B, Choi JS, Lee HM, Oh MJ, Bae HJ, Cho SY, Oh KS, Kim D.  
329 Development of lectin-linked immunomagnetic separation for the detection of hepatitis A  
330 virus. *Viruses*. 2014; 6(3):1037-48.
- 331 11. Kim J, Adhikari M, Dhamane S, Hagström AE, Kourentzi K, Strych U, Willson RC,  
332 Conrad JC. Detection of viruses by counting single fluorescent genetically biotinylated  
333 reporter immunophage using a lateral flow assay. *ACS applied materials & interfaces*.  
334 2015; 7(4):2891.
- 335 12. Doerflinger SY, Tabatabai J, Schnitzler P, Farah C, Rameil S, Sander P, Koromyslova A,  
336 Hansman GS. Development of a Nanobody-Based Lateral Flow Immunoassay for  
337 Detection of Human Norovirus. *mSphere*. 2016; 1(5):e00219-16.

- 338 13. Hagström AE, Garvey G, Paterson AS, Dhamane S, Adhikari M, Estes MK, Strych U,  
339 Kourentzi K, Atmar RL, Willson RC. Sensitive detection of norovirus using phage  
340 nanoparticle reporters in lateral-flow assay. *PloS one*. 2015; 10(5):e0126571.
- 341 14. Davaji B, Lee CH. A paper-based calorimetric microfluidics platform for bio-chemical  
342 sensing. *Biosensors and Bioelectronics*. 2014; 59:120-6.
- 343 15. Zhang Y, Zuo P, Ye BC. A low-cost and simple paper-based microfluidic device for  
344 simultaneous multiplex determination of different types of chemical contaminants in food.  
345 *Biosensors and Bioelectronics*. 2015; 68:14-9.
- 346 16. Singh DK, Iyer PK, Giri PK. Role of molecular interactions and structural defects in the  
347 efficient fluorescence quenching by carbon nanotubes. *Carbon*. 2012; 50(12):4495-505.
- 348 17. Alig I, Pötschke P, Lellinger D, Skipa T, Pegel S, Kasaliwal GR, Villmow T.  
349 Establishment, morphology and properties of carbon nanotube networks in polymer melts.  
350 *Polymer*. 2012; 53(1):4-28.
- 351 18. Huang PJ, Liu J. DNA□length□dependent fluorescence signaling on graphene oxide  
352 surface. *Small*. 2012; 8(7):977-83.
- 353 19. Lin B, Yu Y, Li R, Cao Y, Guo M. Turn-on sensor for quantification and imaging of  
354 acetamiprid residues based on quantum dots functionalized with aptamer. *Sensors and*  
355 *Actuators B: Chemical*. 2016; 229:100-9.
- 356 20. Escudero-Abarca BI, Suh SH, Moore MD, Dwivedi HP, Jaykus LA. Selection,  
357 characterization and application of nucleic acid aptamers for the capture and detection of  
358 human norovirus strains. *PLoS One*. 2014; 9(9):e106805.



- 359 21. Mu X, Zhang L, Chang S, Cui W, Zheng Z. Multiplex microfluidic paper-based  
360 immunoassay for the diagnosis of hepatitis C virus infection. *Analytical chemistry*. 2014;  
361 86(11):5338-44.
- 362 22. Tian F, Lyu J, Shi J, Yang M. Graphene and graphene-like two-denominational materials  
363 based fluorescence resonance energy transfer (FRET) assays for biological applications.  
364 *Biosensors and Bioelectronics*. 2017; 89: 123-35.
- 365 23. Thomsen V, Schatzlein D, Mercurio D. Limits of detection in spectroscopy. *Spectroscopy*.  
366 2003; 18(12):112-4.

367

368

369

### Figure Captions

370

371 **Fig. 1 a** Schematic illustration of turn-on sensor based on MWCNTs and 6-FAM functionalized  
372 aptamer, illustrating the principle of the NoV detection based on the nanomaterial MWCNTs  
373 (GO), NoV aptamer and NoV VLPs. The fluorescence of the NoV aptamer would be quenched  
374 when they were mixed and coated on the paper surface due to the FRET process between the  
375 probe and GO. In the presence of the NoV, the aptamer would bond to the protein because of the  
376 stronger association constant between them, resulting in the fluorescence recovery. **b** Schematic  
377 of the paper-based microfluidic device design for NoV detection using NoV aptamer  
378 functionalized MWCNTs. **c** the picture of the paper-based microfluidic device.

379 **Fig. 2** Characterization of the carboxylic acid functionalized MWCNTs and GO. **a** TEM images  
380 of MWCNTs. **b** TEM images of GO. **c** UV-Vis absorption spectra of the MWCNTs and bare GO.  
381 **d** Fluorescence spectra of 6-FAM NoV aptamer (Ex=490 nm, Em=520 nm)

382 **Fig. 3** Quenching effect of MWCNTs of various concentrations at **a** 1  $\mu\text{M}$  and **b** 5  $\mu\text{M}$  NoV  
383 aptamer versus time. Recovery effect of MWCNTs of various concentrations at **c** 1  $\mu\text{M}$  and **d** 5  
384  $\mu\text{M}$  NoV aptamer versus time.

385 **Fig. 4** Quenching effect of GO of various concentrations at **a** 1  $\mu\text{M}$  and **b** 5  $\mu\text{M}$  NoV aptamer  
386 versus time. Recovery effect of GO of various concentrations at **c** 1  $\mu\text{M}$  and **d** 5  $\mu\text{M}$  NoV  
387 aptamer versus time.

388 **Fig. 5** Investigation of the selectivity of the biosensor by testing NoV VLPs sample with BSA  
389 and peptidoglycan. **a** MWCNTs **b** GO.

390 **Fig. 6** Fluorescence spectra of the 10-fold NoV VLPs serial dilution of NoV VLPs in buffer  
391 ranging from 0 to 12.9  $\mu\text{g}/\text{mL}$  by **a** MWCNTs **b** GO.

392 **Fig. 7** Standard curves of the NoV VLPs detection by **a** MWCNTs. **b** GO on the paper-based  
393 microfluidic device via the fluorescence intensity changes versus various NoV VLPs  
394 concentration ranging from 0 ~ 12.9  $\mu\text{g}/\text{mL}$ .

**a**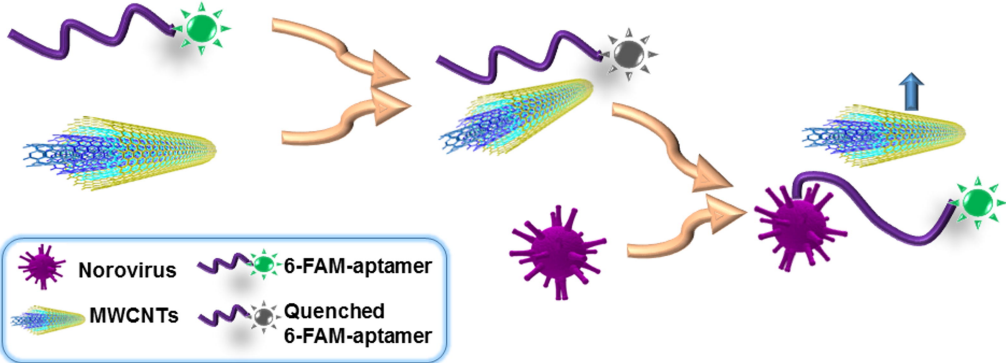**b**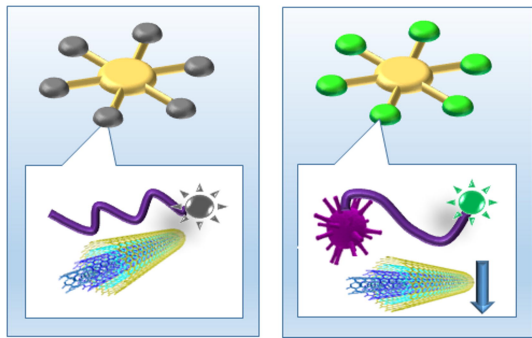**c**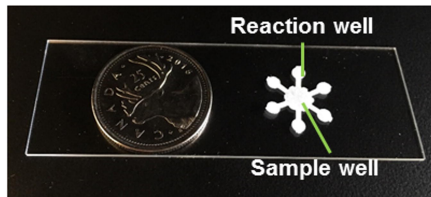

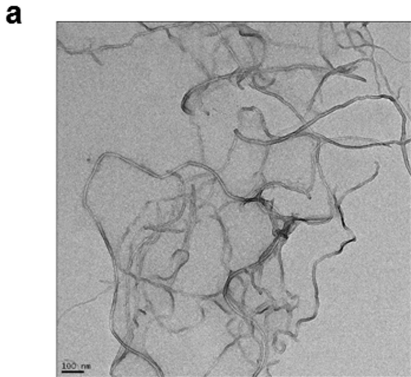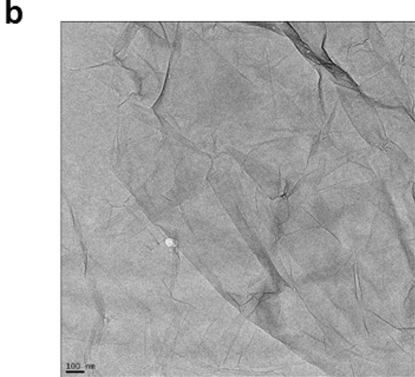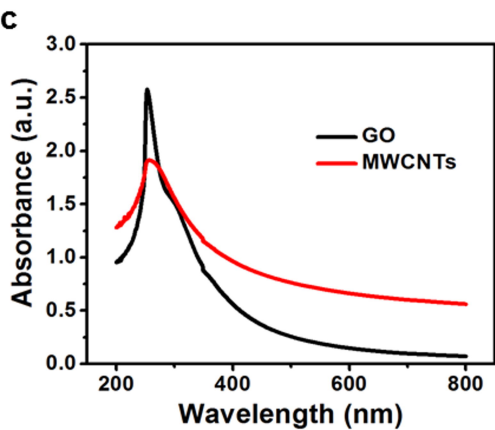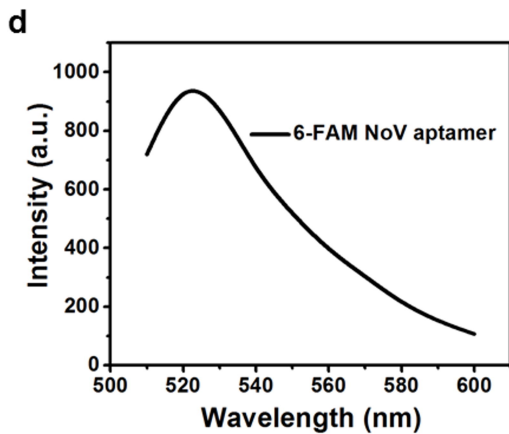

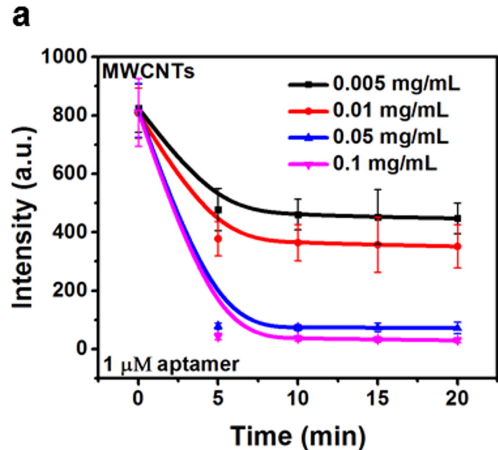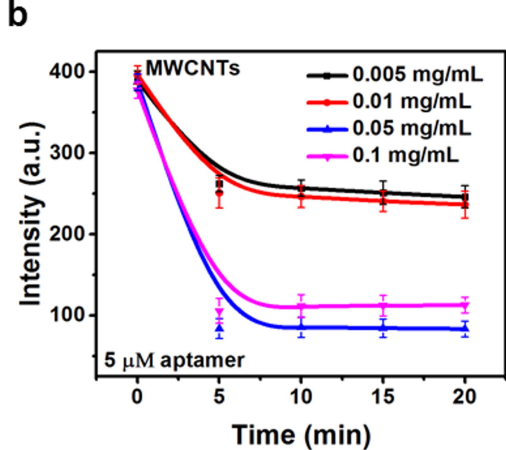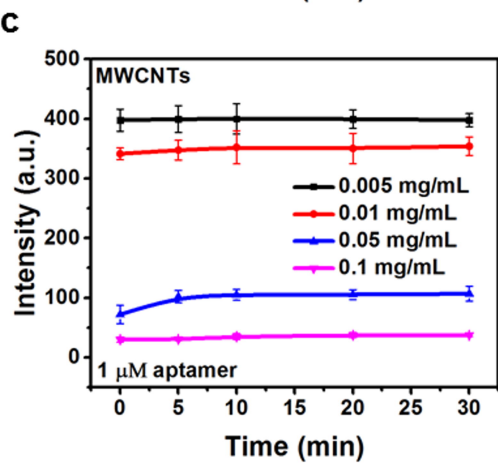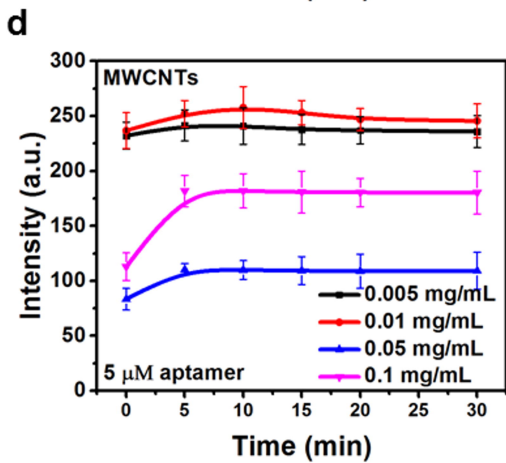

**a**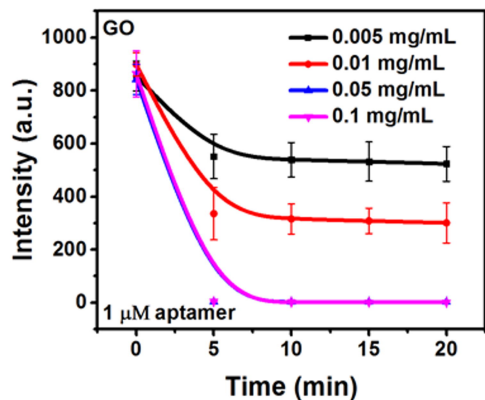**b**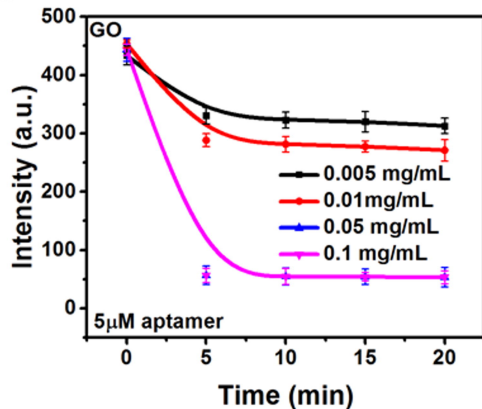**c**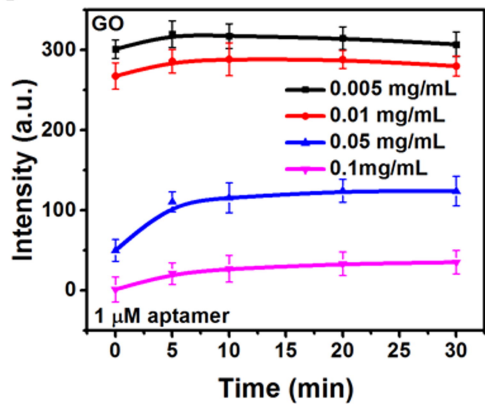**d**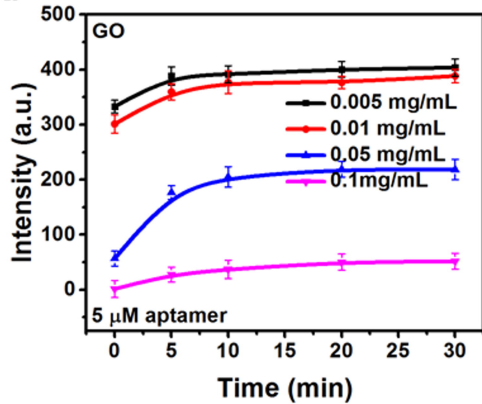

**a**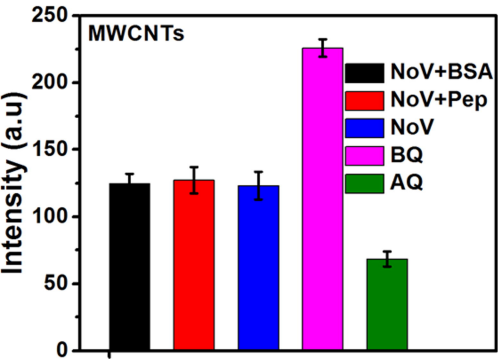**b**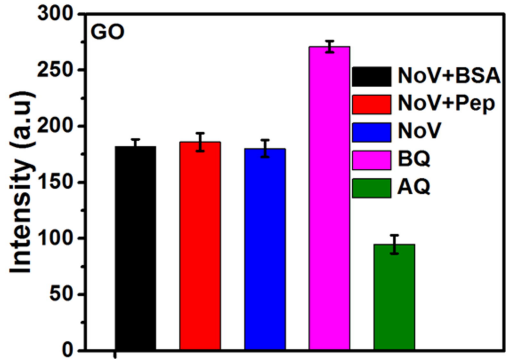

a

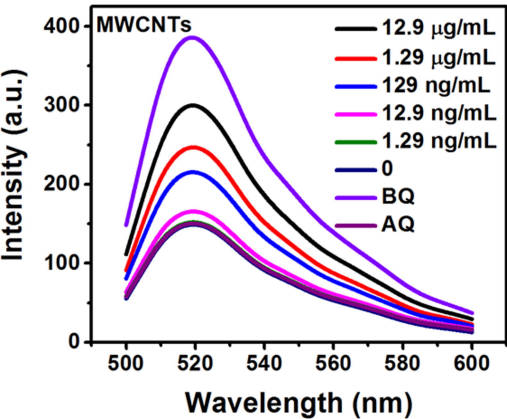

b

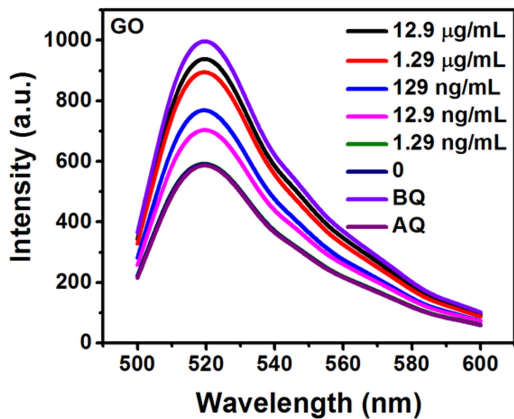



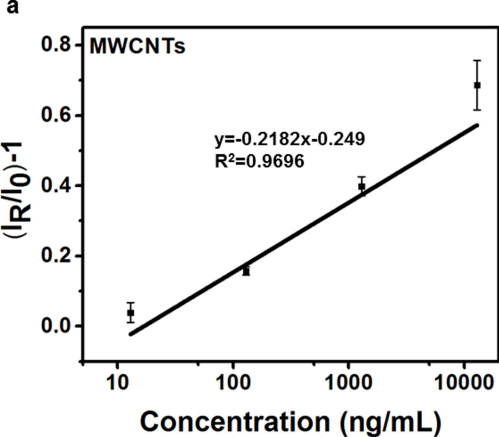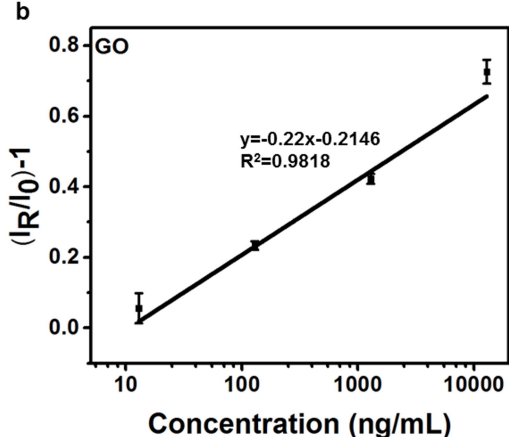

## Ready-to-use paper-based biosensor

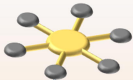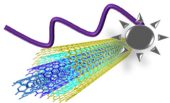

## In the presence of norovirus

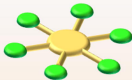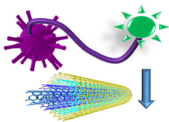

## Results

Dynamic range:  
0~120 nM

Detection limits:  
MWCNTs-40 pM  
GO-30 pM
